# Supplementary material for: Biodegradation of Nodularin by a Microcystin-Degrading Bacterium: Performance, Degradation Pathway, and Potential Application
Source: MDPI journal article supplement (doi:10.3390/toxins13110813), 2021-11-18
Supplement: s1 [file s1]

# Supplementary Materials: Biodegradation of Nodularin by a Microcystin-Degrading Bacterium: Performance, Degradation Pathway, and Potential Application

Mengxuan Yuan, Qin Ding, Rongli Sun, Juan Zhang, Lihong Yin and Yuepu Pu

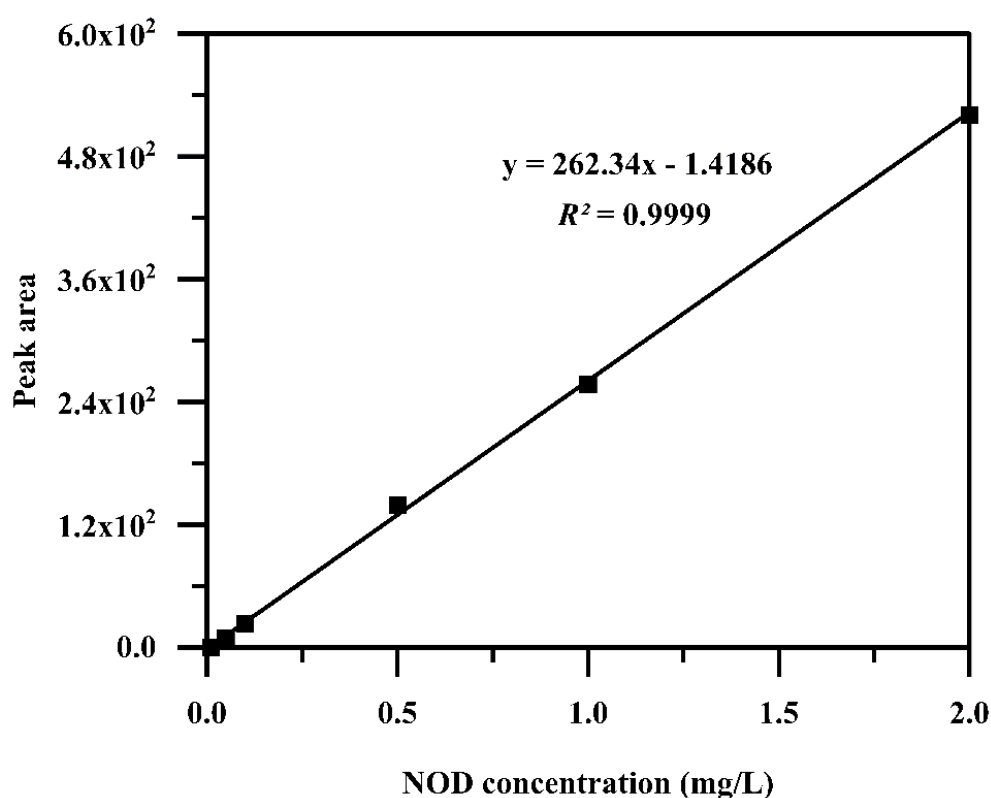

Figure S1. The standard curve of NOD quantified by HPLC (0.01–2.00 mg/L).

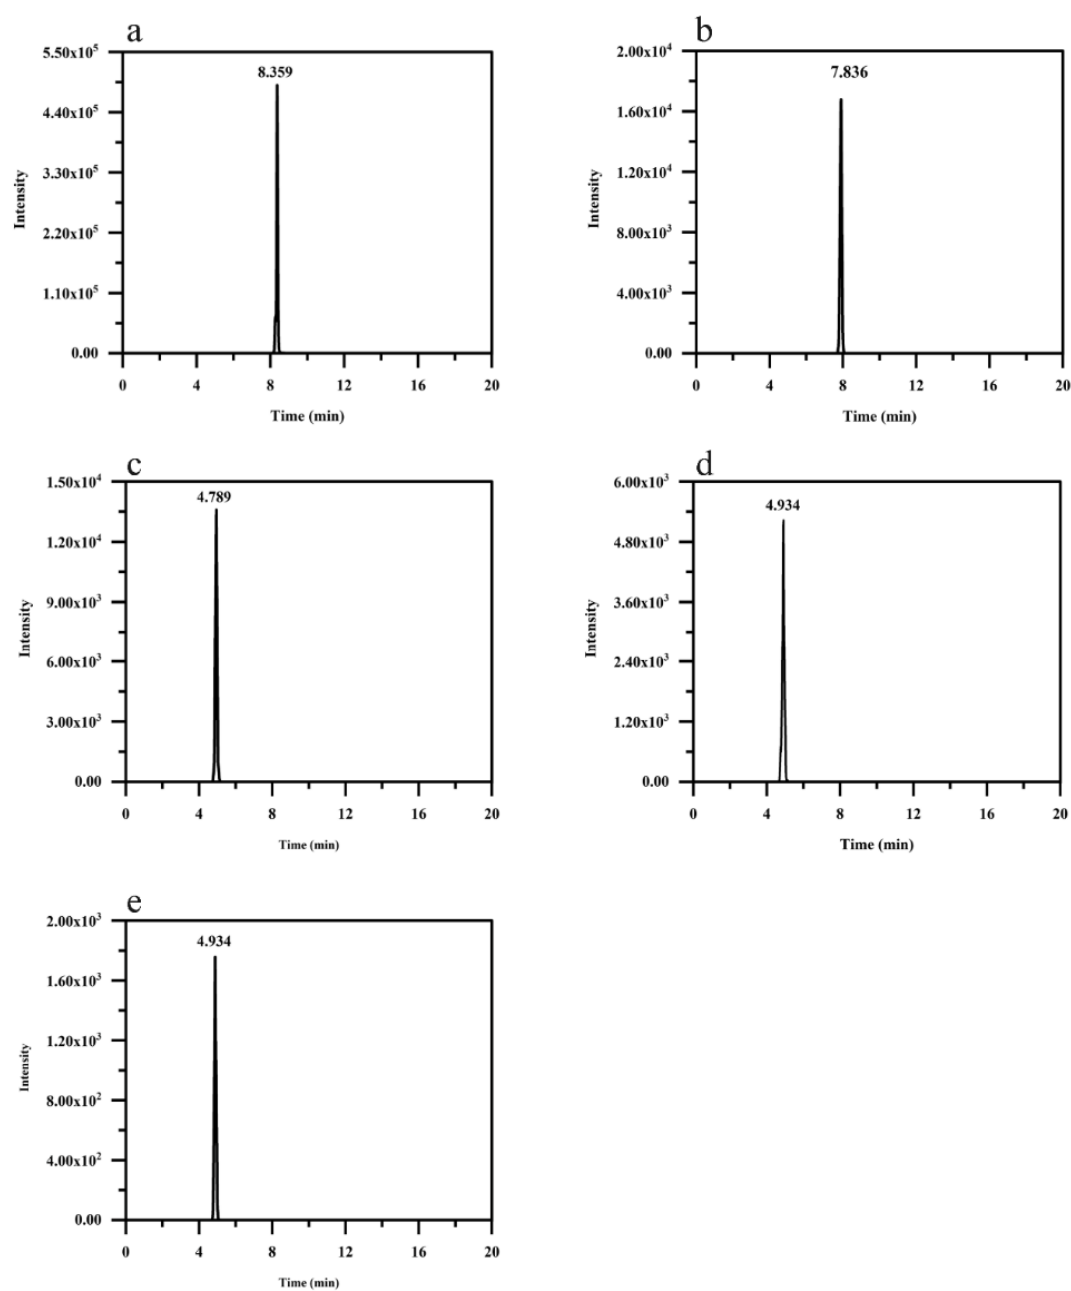

**Figure S2.** Five substance peaks in the TIC during degradation. (a) NOD; (b) Linear NOD; (c) Tetrapeptide; (d) Tripeptide; (e) Dipeptide.

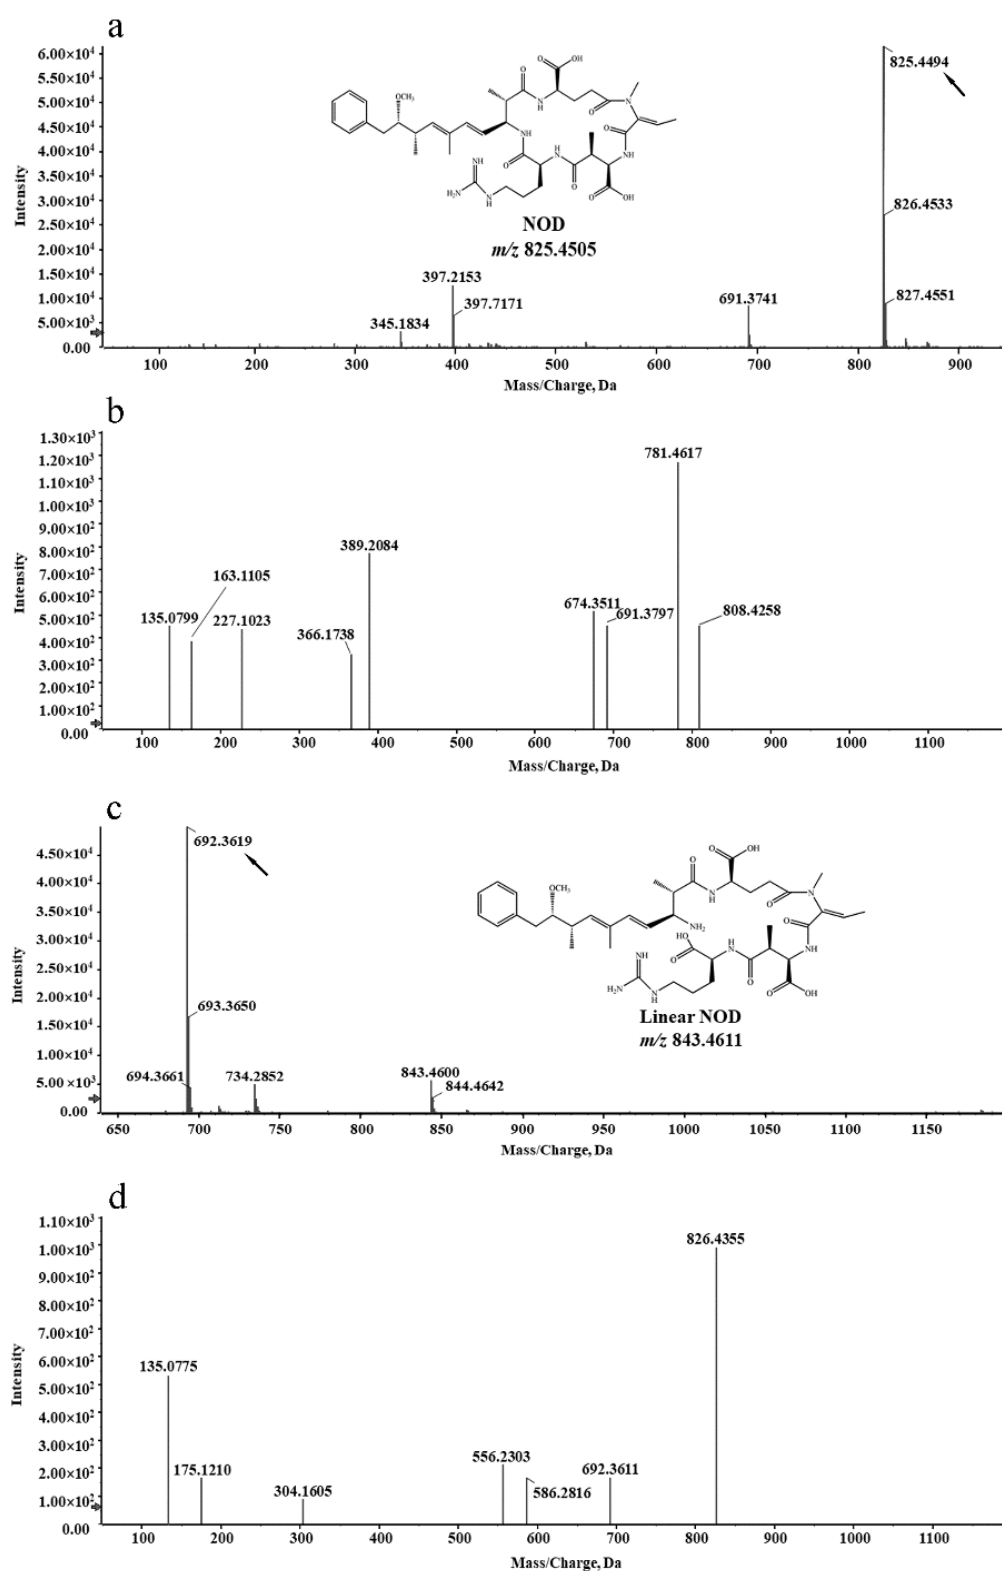

**Figure S3.** UPLC-MS/MS profiles for NOD and linear NOD. (a) MS spectrum for NOD; (b) MS/MS spectrum for NOD; (c) MS spectrum for linear NOD; (d) MS/MS spectrum for linear NOD.

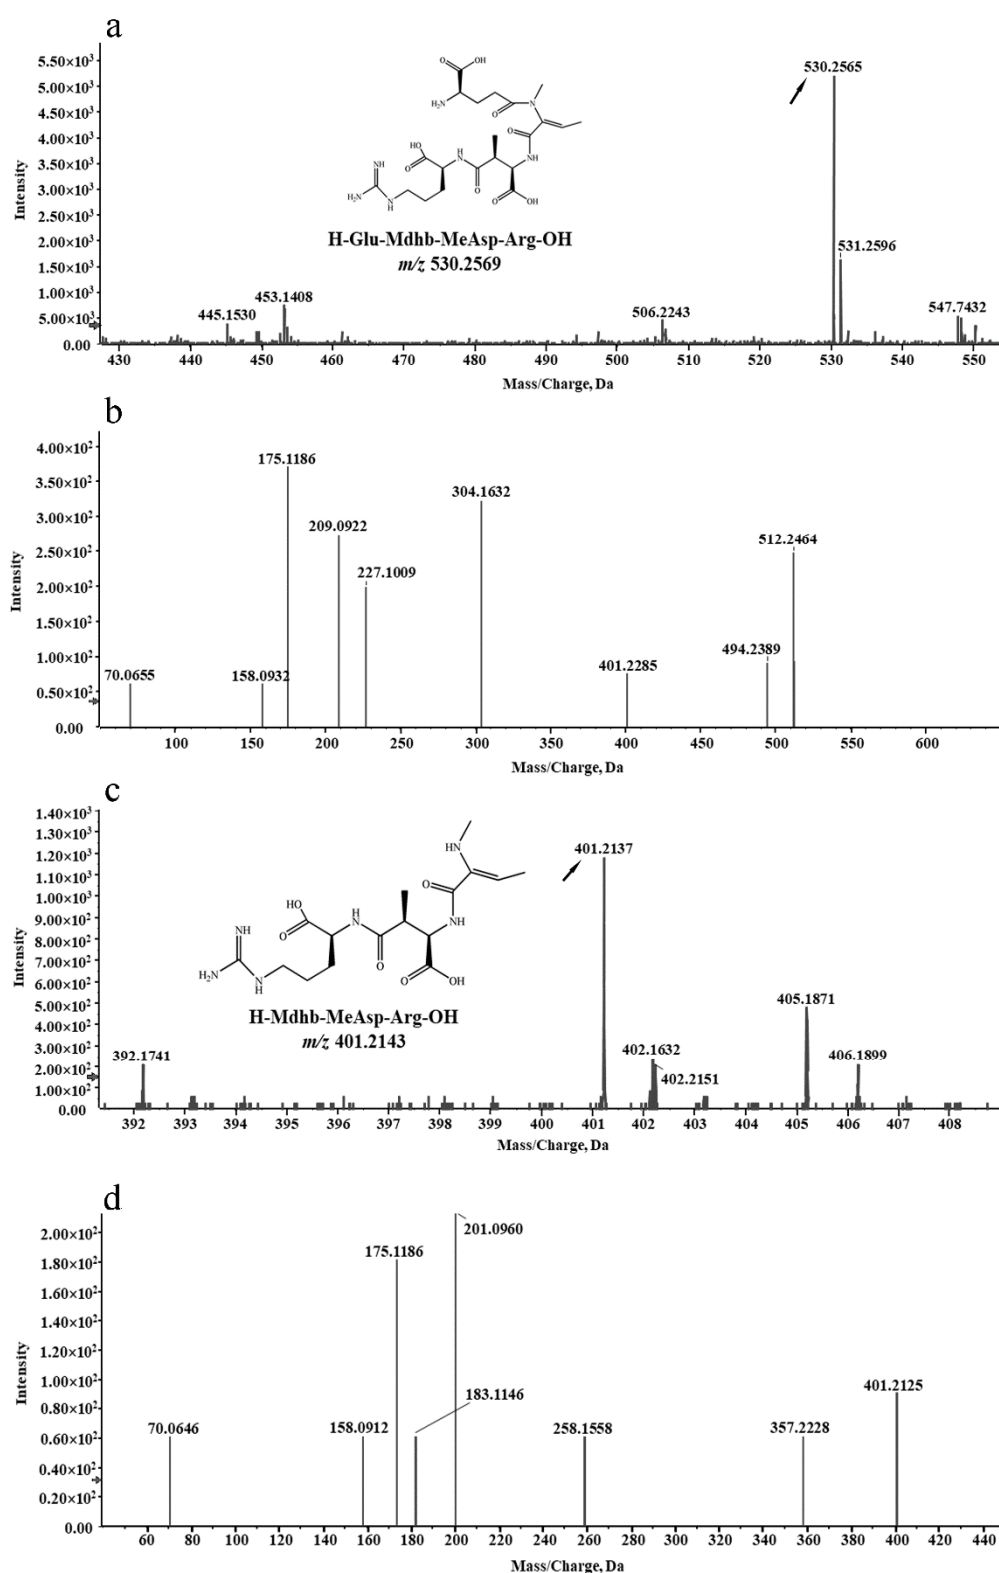

**Figure S4.** UPLC-MS/MS profiles for degradation products. (a) MS spectrum for tetrapeptide; (b) MS/MS spectrum for tetrapeptide; (c) MS spectrum for tripeptide; (d) MS/MS spectrum for tripeptide.

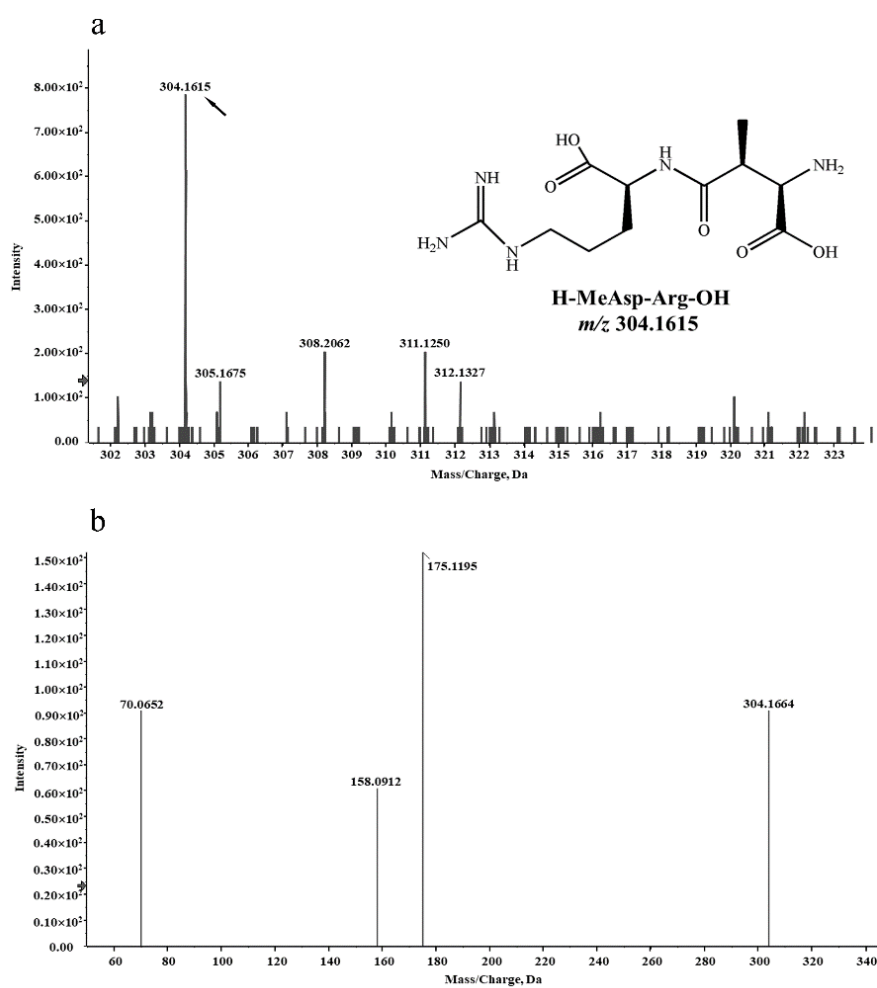

**Figure S5.** UPLC-MS/MS profile of dipeptide. (a) MS spectrum of dipeptide; (b) MS/MS spectrum of dipeptide.

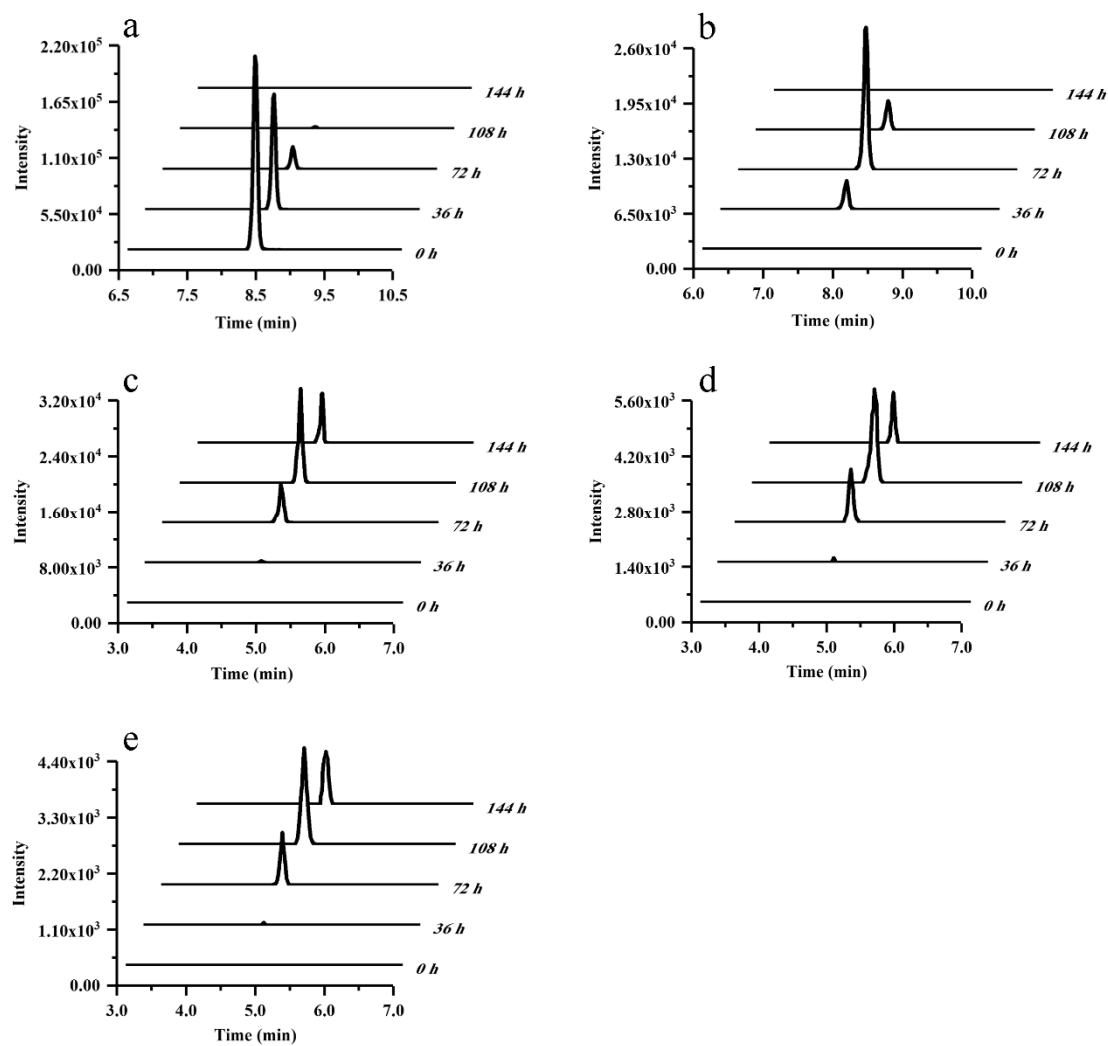

**Figure S6.** The dynamics of peak intensity of NOD and degradation products. (a) NOD; (b) linear NOD; (c) H-Glu-Mdhb-MeAsp-Arg-OH; (d) H-Mdhb-MeAsp-Arg-OH; (e) H-MeAsp-Arg-OH.
